# Supplementary material for: Construction of functional nanonetwork-structured carbon nitride with Au nanoparticle yolks for highly efficient photocatalytic applications
Source: Royal Society of Chemistry journal article supplement (doi:10.1039/c8cc03095b), 2018-01-01
Supplement: c8cc03095b1.pdf [file c8cc03095b1.pdf]

## Electronic Supplementary Information (ESI)

### Construction of functional nanonetwork-structured carbon nitride with Au nanoparticle yolks for highly efficient photocatalytic applications

Kunyi Leng,<sup>a</sup> Weicong Mai,<sup>a</sup> Xingcai Zhang,<sup>b</sup> Ruliang Liu,<sup>\*a</sup> Xidong Lin,<sup>a</sup> Junlong Huang,<sup>a</sup> He Lou,<sup>a</sup> Yiming Xie,<sup>\*c</sup> Ruowen Fu<sup>a</sup> and Dingcai Wu<sup>\*a</sup>

<sup>a</sup> Materials Science Institute, PCFM Lab and GDHPRC Lab, School of Chemistry, Sun Yat-sen University, Guangzhou 510275, P. R. China.

<sup>b</sup> Paulson School of Engineering and Applied Sciences, Harvard University, Cambridge, Massachusetts, 02138, United States.

<sup>c</sup> College of Materials Science and Engineering, Huaqiao University, Xiamen 361021, P. R. China.

\* Email: [wudc@mail.sysu.edu.cn](mailto:wudc@mail.sysu.edu.cn); [liurliang@mail.sysu.edu.cn](mailto:liurliang@mail.sysu.edu.cn); [ymxie@hqu.edu.cn](mailto:ymxie@hqu.edu.cn)

## Experimental

### 1. Sample preparation

**Materials.** *tert*-Butyl acrylate (98%, *t*BA) was purchased from Aladdin and purified by passing through a column filled with basic alumina to remove inhibitors. Other commercially available materials were

purchased from Aladdin or J&K Scientific without further treatment.

***Preparation of Au@SiO<sub>2</sub>.*** Au@SiO<sub>2</sub> was prepared according to a previously reported method.<sup>1</sup> Typically, a stock solution of Au precursor was prepared by dissolving HAuCl<sub>4</sub> (0.0432 g) into deionized water (475 mL), and heated to boiling with intensive stirring. Trisodium citrate (0.25 g) was dissolved in the mixed solution and heated for 30 min under reflux. After the mixed solution cooled down to room temperature, PVP (0.0084 g) was added and the mixed solution was stirred at room temperature for 24 h. The gold nanoparticles (Au NPs) were obtained via centrifugation (12000 rpm, 20 min) and dispersed in 12 mL deionized water. The Au NPs solution and ethanol (38 mL) were mixed together in a 100 ml 3-neck round-bottomed flask and stirred under ultrasound for 30 min. After NH<sub>3</sub>·H<sub>2</sub>O (1.6 mL) was added and stirred for another 10 min, TEOS (1.2 mL in 19 mL ethanol) was added to the mixture in 20 min, followed by stirring for 12 h. The product Au@SiO<sub>2</sub> was obtained and redispersed in 30 ml ethanol.

***Preparation of Au@SiO<sub>2</sub>-Br.*** KH-550 (0.15 mL in 20 mL ethanol) was added dropwise to the Au@SiO<sub>2</sub> solution and stirred for 38 h. The product Au@SiO<sub>2</sub>-NH<sub>2</sub> was obtained via washing by ethanol, water, and CH<sub>2</sub>Cl<sub>2</sub>, respectively. Au@SiO<sub>2</sub>-NH<sub>2</sub> was redispersed and kept in 30 mL anhydrous CH<sub>2</sub>Cl<sub>2</sub>. Triethylamine (1.4 mL) was added into the Au@SiO<sub>2</sub>-NH<sub>2</sub> solution under the N<sub>2</sub> atmosphere. 2-Bromopropionyl

bromide (1 mL in 4 mL anhydrous  $\text{CH}_2\text{Cl}_2$ ) was added slowly to the mixture under ice bath and reacted for 3 h. Then the reaction temperature was raised to 25 °C and kept for 48 h. After being filtrated and washed by mixed solution (tetrahydrofuran: $\text{H}_2\text{O}$  = 1:1, volume ratio) for three times, the product  $\text{Au@SiO}_2\text{-Br}$  was dried in vacuum drying oven at 40 °C for 12 h. The Br content of  $\text{Au@SiO}_2\text{-Br}$  was measured to be approximately 0.684 mmol  $\text{g}^{-1}$ , according to a reported method.<sup>2</sup>

***Preparation of  $\text{Au@SiO}_2\text{-g-PtBA}$  and  $\text{Au@SiO}_2\text{-g-PAA}$ .*** The  $\text{Au@SiO}_2\text{-Br}$  initiator (0.1 g) was added to the mixed solution of *tert*-butyl acrylate (*tBA*) monomer,  $\text{CuBr}_2$ ,  $\text{CuBr}$ , and PMDETA (the molar ratio is [*tBA*]: [ $\text{Au@SiO}_2\text{-Br}$ ]: [ $\text{CuBr}$ ]: [ $\text{CuBr}_2$ ]: [PMDETA] = 1000:1:4:0.4:4.4) at room temperature under the  $\text{N}_2$  atmosphere. Then the temperature was raised to 65 °C and kept for 48 h. After the reaction stopped, 200 mL ethanol was added to the mixture and the product  $\text{Au@SiO}_2\text{-g-PtBA}$  was obtained by centrifugation (12000 rpm, 5 min).

$\text{Au@SiO}_2\text{-g-PtBA}$  (0.3 g) was then dissolved in 30 mL  $\text{CH}_2\text{Cl}_2$ , followed by the addition of 10 mL trifluoroacetic acid. The mixture was stirred at room temperature for 24 h. After hydrolysis, the product  $\text{Au@SiO}_2\text{-g-PAA}$  was gradually precipitated in  $\text{CH}_2\text{Cl}_2$ , washed with  $\text{CH}_2\text{Cl}_2$ , and thoroughly dried under vacuum at 40 °C overnight.

***Preparation of FNNS- $\text{C}_3\text{N}_4\text{-Au}$  and pristine  $\text{C}_3\text{N}_4$ .***  $\text{Au@SiO}_2\text{-g-PAA}$  (0.1 g) and melamine (1 g) were dissolved in deionized water (35 mL),

and the mixture was added to a hydrothermal reactor for 5 h under 100 °C. Then the product Au@SiO<sub>2</sub>-g-PAA/MA was obtained by filtration and washed with the deionized water. Au@SiO<sub>2</sub>-g-PAA/MA was then heated in a covered quartz container from room temperature to 400 °C with a heating rate of 2.3 °C min<sup>-1</sup> in N<sub>2</sub> flow. The temperature was kept at 400 °C for 2 h, and then increased to 550 °C and stabilized for another 3 h. The resulting material was etched by HF for 12 h, leading to formation of FNNS-C<sub>3</sub>N<sub>4</sub>-Au.

Pristine C<sub>3</sub>N<sub>4</sub> was prepared as follows: Melamine was heated in a covered quartz container from room temperature to 400 °C with a heating rate of 2.3 °C min<sup>-1</sup> in the N<sub>2</sub> flow. The temperature was kept at 400 °C for 2 h, and then increased to 550 °C and stabilized for another 3 h.

## **2. Characterization**

The powder X-ray diffraction (XRD) patterns were obtained by a D-MAX 2200 VPC diffractometer at 40 kV and 40 mA using Cu Ka radiation ( $\lambda = 1.54 \text{ \AA}$ ). Diffraction patterns were recorded over a  $2\theta$  range ( $10^\circ < 2\theta < 80^\circ$ ) with a scan rate of  $10^\circ \text{ min}^{-1}$ . UV-vis diffuse reflectance spectra were recorded to study the optical absorbance of the photocatalysts using a Shimadzu UV-3100 spectrophotometer in the wavelength range of 200-800 nm with BaSO<sub>4</sub> as a reference. Fourier transform infrared (FTIR) measurements were carried out on Bruker Tensor 27 spectrometer in the frequency range of 4000-500 cm<sup>-1</sup> with a

resolution of 4 cm<sup>-1</sup> with KBr as the reference diluent. The morphology and structure analysis of the as-synthesized samples were measured by a transmission electron microscopy (TEM, JEM-1400 Plus) at an accelerating voltage of 200 kV and a field emission scanning electron microscopy (FESEM, Hitachi S-4800). Gel permeation chromatography (GPC) was performed using a Waters GPC 2414 with a refractive index detector at 40 °C (mobile phase: tetrahydrofuran).

### 3. Photocatalysis test

**Photocatalytic reaction.** The photocatalytic activities of the samples were evaluated by the degradation of methyl orange (MO) (10 mg L<sup>-1</sup>) solution with a 300 W Xenon lamp (HSX-F300, Beijing NBeT) as the visible light source ( $\lambda \geq 420$  nm). In a typical run, 0.04 g of the photocatalysts were added to 50 mL of MO (10 mg L<sup>-1</sup>) aqueous solution and stirred in the dark for 30 min to reach the adsorption/desorption equilibrium between the dye and the catalyst. Then the mixed solution was exposed to visible light irradiation ( $\lambda \geq 420$  nm) under magnetic stirring. At a given time interval of irradiation, 0.3 mL of the solution was withdrawn and removed from the photocatalyst by centrifugation. The concentrations of the residual dye were tested by the UV-vis spectrophotometer at 464 nm.

**Photoelectrochemical measurement.** The photocurrent response and electrochemical impedance spectra (EIS) of prepared photocatalysts were recorded with an electrochemical station (CHI 660D, Chenhua, Shanghai,

China) in a typical three-electrode system, whose electrolyte was Na<sub>2</sub>SO<sub>4</sub> aqueous solution (1 M). A platinum wire and saturated calomel electrode (SCE) were served as the counter electrode and the reference electrode, respectively. The glassy carbon electrodes modified with photocatalysts (pristine C<sub>3</sub>N<sub>4</sub> and FNNS-C<sub>3</sub>N<sub>4</sub>-Au) were used as the working electrodes.

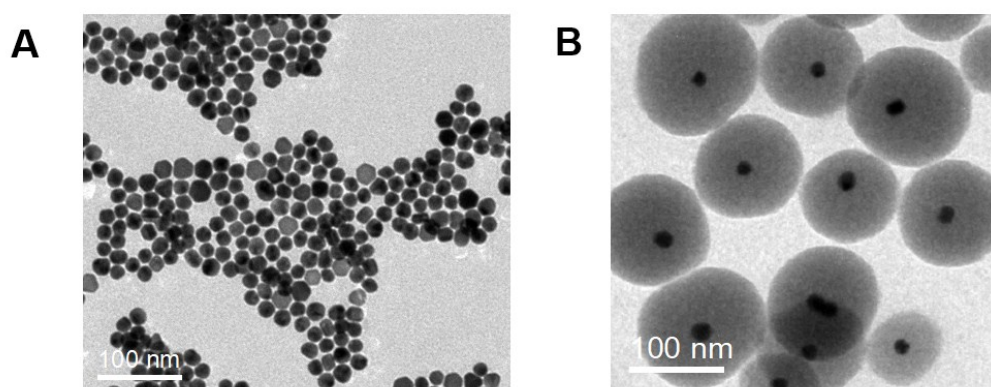

**Fig.S1** TEM images of (A) Au NPs and (B) Au@SiO<sub>2</sub> NPs

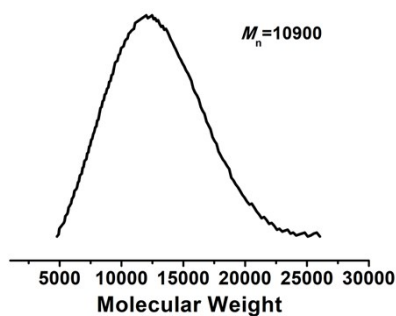

**Fig.S2** GPC trace of cleaved PtBA of Au@SiO<sub>2</sub>-g-PtBA.

## Reference

1. Y. Yao, X. Zhang, J. Peng and Q. Yang, *Chem. Com.*, 2015, **51**, 3750-3753.
2. Y. Liang, L. Chen, D. Zhuang, H. Liu, R. Fu, M. Zhang, D. Wu and K. Matyjaszewski, *Chem. Sci.*, 2017, **8**, 2101-2106.
